# Supplementary material
Source: PubMed Central journal article supplement (PMC3679246)
Supplement: NIHMS467795-supplement-1.pdf [file NIHMS467795-supplement-1.pdf]

## Supplementary Material

### **Mutated PPP1R3B is recognized by T cells used to treat a melanoma patient who experienced a durable complete tumor regression**

Yong-Chen Lu,\* Xin Yao,\* Yong F. Li,\* Mona El-Gamil,\* Mark E. Dudley,\* James C. Yang,\* Jorge M. Almeida,<sup>†</sup> Daniel C. Douek,<sup>†</sup> Yardena Samuels,<sup>‡</sup> Steven A. Rosenberg,\* and Paul F. Robbins\*

\*Surgery Branch, National Cancer Institute, National Institutes of Health, Bethesda, MD 20892;

<sup>†</sup>Human Immunology Section, National Institute of Allergy and Infectious Diseases, National Institutes of Health, Bethesda, MD 20892; <sup>‡</sup>Department of Molecular Cell Biology, Weizmann Institute of Science, Rehovot 76100, Israel.

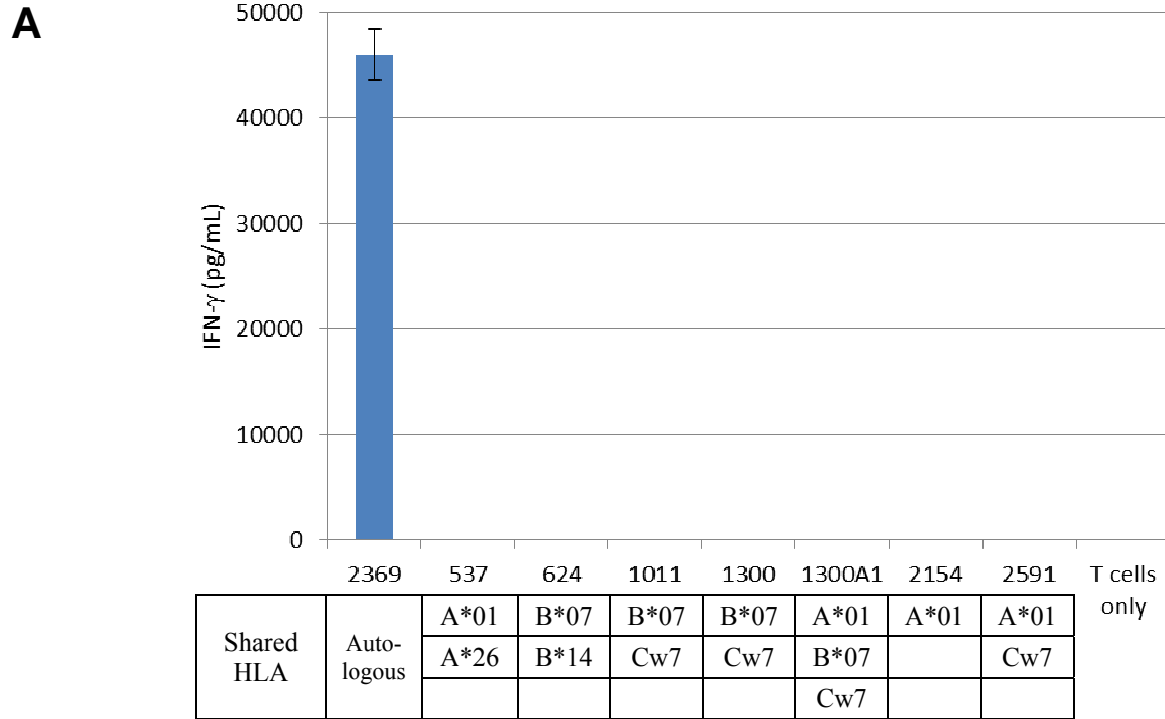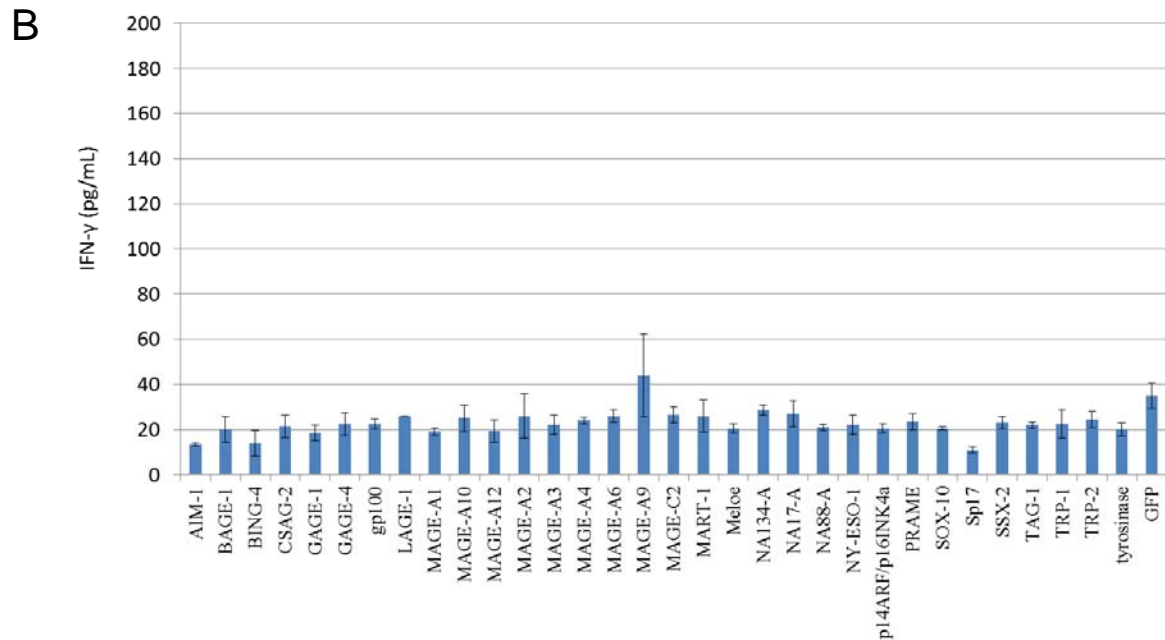

**Supplementary Figure 1.** TIL 2369 T cells predominantly recognize unique, not shared antigens. **(A)** TIL 2369 T cells were co-cultured with a panel of melanoma cell lines that shared HLA gene expressions with autologous cells. **(B)** 293-A1 cells were transfected with a panel of previously described non-mutated melanoma antigens, and these transfected cells were then co-cultured with TIL 2369 T cells overnight. The concentration of IFN- $\gamma$  was determined by ELISA. A positive control of GFP was included to demonstrate the effectiveness of the transfection.

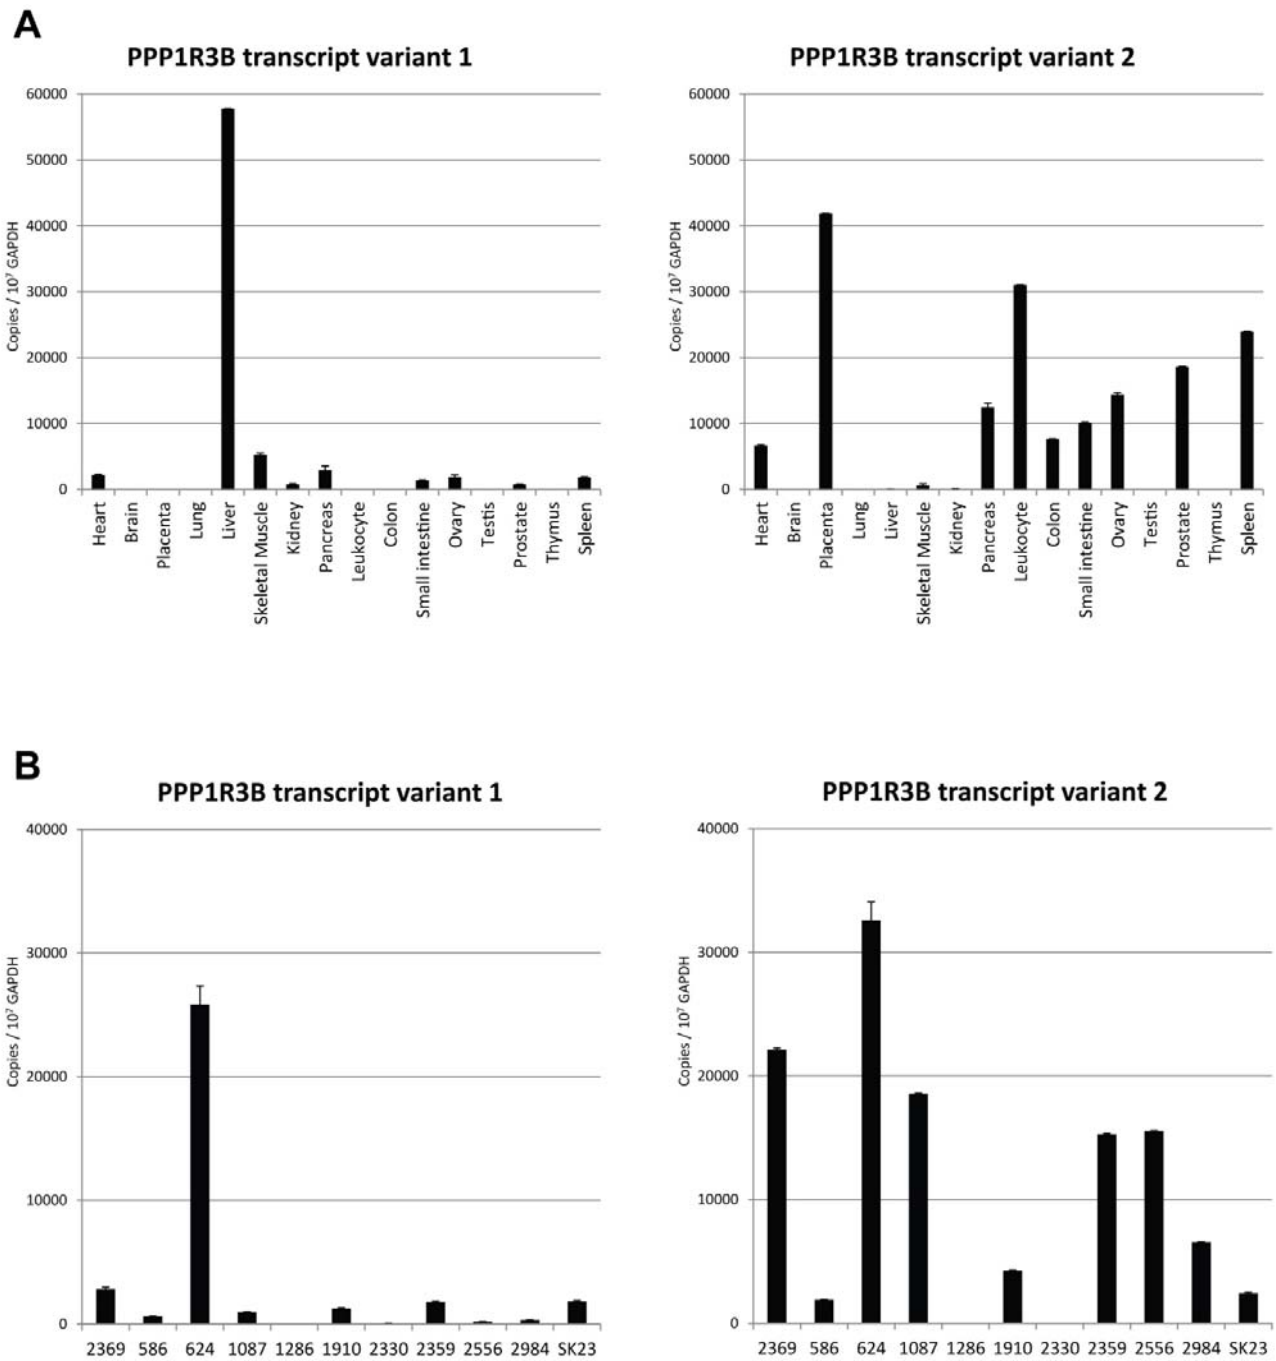

**Supplementary Figure 2.** PPP1R3B mRNA expression in normal tissue and melanoma cell lines. The copy numbers of PPP1R3B transcript variant 1 and variant 2 from normal tissue (**A**) and melanoma samples (**B**) were determined by quantitative PCR.

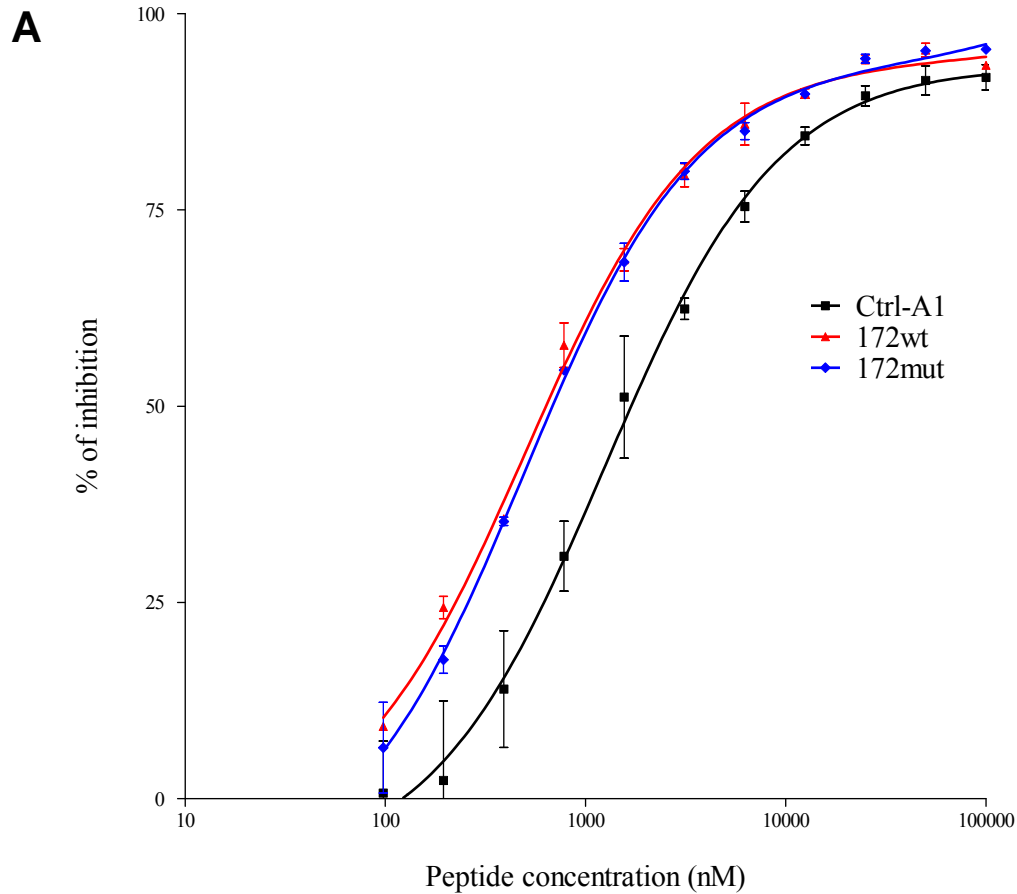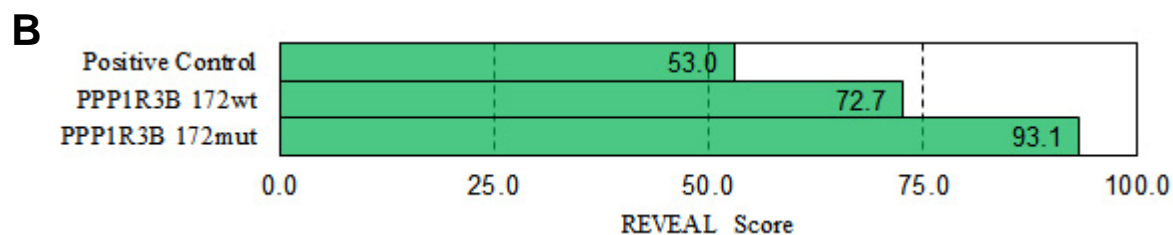

**Supplementary Figure 3.** Both PPP1R3B 172wt and 172mut bind HLA-A\*01. **(A)** Acid-treated autologous EBV-transformed B cells were incubated 24 hr with the fluorescent reference peptide Fl-A1, together with test peptides at various concentrations. The binding of fluorescent peptide was determined by flow cytometry, and the percentage of inhibition of fluorescent peptide was calculated. The  $IC_{50}$  of Ctrl-A1 (A\*01 consensus sequence) is 200 nM **(B)** Graphical representation of ProImmune REVEAL MHC-peptide binding assay for HLA A\*0101. Peptides and the positive control in DMSO (1 mM) were used in this assay. Peptides with scores > 45% of the positive control (REVEAL Score > 24) are considered to be good binders.

| (A) Patient Infusion |                       |                                                  |        |           |
|----------------------|-----------------------|--------------------------------------------------|--------|-----------|
| Rank #               | TCR V $\beta$         | CDR3 sequence                                    | Counts | Freq. (%) |
| 1                    | TRBV27 (V $\beta$ 14) | gccagcagcttcggacagggcgtcc<br>ctcggcggcagctat     | 59752  | 42.58     |
| 2                    | TRBV25-1              | gccagcagtgaaacctatggtgtctg<br>ggccaacgtctgact    | 12202  | 8.70      |
| 3                    | TRBV11-3              | gccagcagtgtagcagcagcggcgg<br>ccccgtggagaccagctac | 7244   | 5.16      |
| 4                    | TRBV28                | gccagcagccccgcgccctcga<br>aggaccgggagcgtgttt     | 5049   | 3.60      |
| 5                    | TRBV29-1              | agcgttgatagtcagggcggggg<br>gactatgctacacc        | 4646   | 3.31      |
| 6                    | TRBV7-3               | gccagcagctatctagcgggagac<br>ggcaatgagcagttc      | 2983   | 2.13      |
| 7                    | TRBV28                | gccagcagttttgggactgggcagt<br>tc                  | 2941   | 2.10      |
| 8                    | TRBV13                | gccagcagctcccgcagggggc<br>cccaatgagcagttc        | 2819   | 2.01      |
| 9                    | TRBV3-1               | gccagcagccaaggcgggggt<br>gggtggagaatgagcagttc    | 2646   | 1.89      |
| 10                   | TRBV9                 | gccagcagcttcggcgggtcccgg<br>ggagctgttt           | 2105   | 1.50      |
| 11                   | TRBV4-3               | gccagcagccaagatctactagcg<br>ggagaccggggagctgttt  | 1934   | 1.38      |
| 12                   | TRBV27                | gccagcagtttatcgggacaggg<br>ggcgtgaatggctacacc    | 1733   | 1.23      |
| 13                   | TRBV6-1               | gccagcagagcgttgactagcgtg<br>gagcagttc            | 1703   | 1.21      |
| 14                   | TRBV4-3               | gccagcagccaagactccacagc<br>gggaccagctac          | 1602   | 1.14      |
| 15                   | TRBV6-5               | gccagcagctttggacaggggaaga<br>accggggagcgtgttt    | 1595   | 1.14      |
| 16                   | TRBV12-4              | gccacctcccggcccgtttgact<br>atggctacacc           | 1439   | 1.03      |
| 17                   | TRBV6-2 & 6-3         | gccagcagttacgtgcaaaacattc<br>agtac               | 1124   | 0.80      |
| 18                   | TRBV4-1               | gccagcagccaagagagagcgg<br>ggccccggcagatagcagctat | 1122   | 0.80      |
| 19                   | TRBV5-1               | gccagcagcttccccggaactaat<br>gaaaaactgttt         | 839    | 0.60      |
| 20                   | TRBV6-5               | gccaccacctcacagggggcgc<br>gggagatagcagctat       | 721    | 0.51      |

| (B) After A REP |                       |                                                   |        |           |
|-----------------|-----------------------|---------------------------------------------------|--------|-----------|
| Rank #          | TCR V $\beta$         | CDR3 sequence                                     | Counts | Freq. (%) |
| 1               | TRBV27 (V $\beta$ 14) | gccagcagcttcggacagggcgtcc<br>ctcggcggcagctat      | 29386  | 40.61     |
| 2               | TRBV11-3              | gccagcagtgtagcagcagcggcgg<br>ccccgtggagaccagctac  | 7432   | 10.27     |
| 3               | TRBV25-1              | gccagcagtgaaacctatggtgtctg<br>ggccaacgtctgact     | 1998   | 2.76      |
| 4               | TRBV7-3               | gccagcagctatctagcgggagac<br>ggcaatgagcagttc       | 1426   | 1.97      |
| 5               | TRBV13                | gccagcagctcccgcagggggc<br>cccaatgagcagttc         | 1256   | 1.74      |
| 6               | TRBV28                | gccagcagccccgcgccctcga<br>aggaccgggagcgtgttt      | 1062   | 1.47      |
| 7               | TRBV6-2 & 6-3         | gccagcagttacgtgcaaaacatte<br>agtac                | 1050   | 1.45      |
| 8               | TRBV20-1              | agtgtcagtagtagtcggggggg<br>ggccaagagaccagctac     | 1002   | 1.38      |
| 9               | TRBV29-1              | agcgttgatagtcagggcggggg<br>gactatgctacacc         | 941    | 1.30      |
| 10              | TRBV30                | gcctggcatgagagacaggttt<br>aactatggctacacc         | 722    | 1.00      |
| 11              | TRBV28                | gccagcagttttgggactgggcagt<br>tc                   | 712    | 0.98      |
| 12              | TRBV15                | gccccctggggggggcggagaga<br>aacctgaagctttc         | 668    | 0.92      |
| 13              | TRBV6-5               | gccagcagctttggacaggggaaga<br>accggggagcgtgttt     | 489    | 0.68      |
| 14              | TRBV25-1              | gccagcagtgacgcggatcctac<br>aatgagcagttc           | 435    | 0.60      |
| 15              | TRBV12-4              | gccagcagtttaagtcggggcgcac<br>gggtccgggagaccagctac | 406    | 0.56      |
| 16              | TRBV6-5               | gccagcagggcccgggtcagcaac<br>taataaaaactgttt       | 403    | 0.56      |
| 17              | TRBV4-1               | gccagcagccaagagagagcgg<br>ggccccggcagatagcagctat  | 388    | 0.54      |
| 18              | TRBV6-5               | gccagcagttacaccgggacaggg<br>ggaatccattcagctac     | 335    | 0.46      |
| 19              | TRBV6-5               | gccaccacctcacagggggcgc<br>gggagatagcagctat        | 294    | 0.41      |
| 20              | TRBV28                | gccagcagtttagatgtgtttacc<br>aagagaccagctac        | 265    | 0.37      |

**Supplementary Table 1.** Representation of dominant T cell clonotypes is similar in the infused TIL 2369 (A) and *in vitro* re-expanded TILs (B). TCR beta chain variable region cDNA sequences were obtained by deep sequencing. The dominant TRBV27 (V $\beta$ 14) clonotype, as well as the majority of the additional clonotypes, is similarly represented in the infused TIL 2369 as well as in TILs that were expanded in a second REP with anti-CD3 antibody.
